# Supplementary material
Source: PubMed Central journal article supplement (PMC6758584)
Supplement: mcz062_suppl_supplementary_materials.pdf [file mcz062_suppl_supplementary_materials.pdf]

Supplementary Data

**Alternative analyses of compensatory base changes in an ITS2 phylogeny of  
Corydalis (Papaveraceae)**

**Meihui Li<sup>1,†</sup>, Hong Zhao<sup>1,†</sup>, Fengxi Zhao<sup>1</sup>, Lu Jiang<sup>2</sup>, Huasheng Peng<sup>2</sup>, Wei Zhang<sup>1,3,\*</sup>  
and Mark P. Simmons<sup>3</sup>**

<sup>1</sup>Marine College, Shandong University, Weihai, 264209, China, <sup>2</sup>College of Pharmacy, Anhui University of Chinese Medicine, Hefei, 230012, China and <sup>3</sup>Department of Biology, Colorado State University, Fort Collins, Co 80523, USA

†These authors contributed equally to this work.

\*For correspondence. E-mail wzhang@sdu.edu.cn

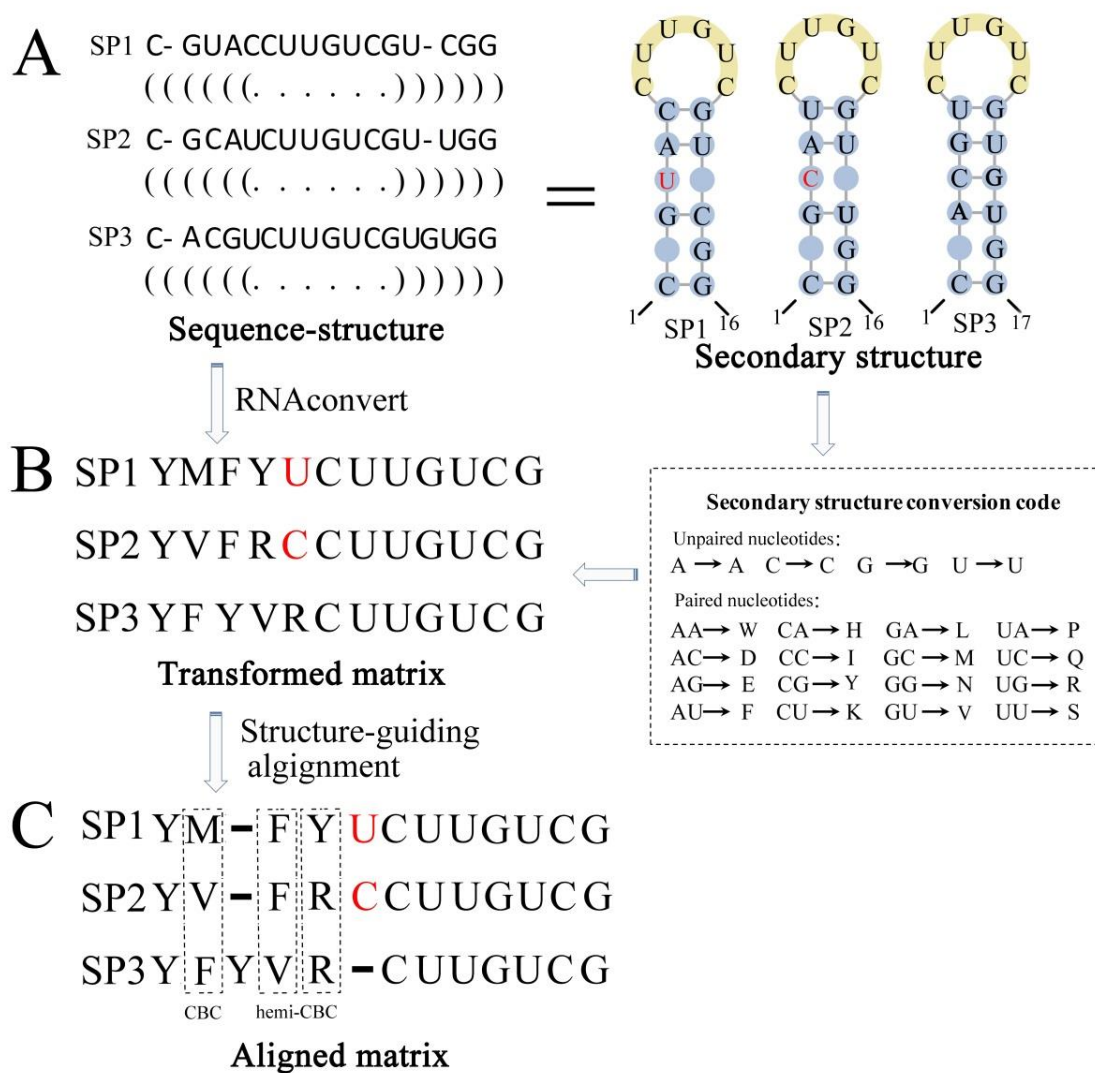

**Fig. S1.** A workflow illustrating how base-pair information is transformed into an alignment. A. Sequences of three species and their corresponding secondary structures. B. The secondary-structure base-pair information is coded by RNAconvert and transformed into character sequences. The base pairs are listed first and then followed by the unpaired bases in the transformed sequence. The first unpaired nucleotides in sp1 and sp2 are highlighted in red to show their corresponding positions in the transformed matrix. C. Alignment of the coded sequences according to their homologous positions in secondary structure. CBC and hemi-CBC can be identified from this alignment.

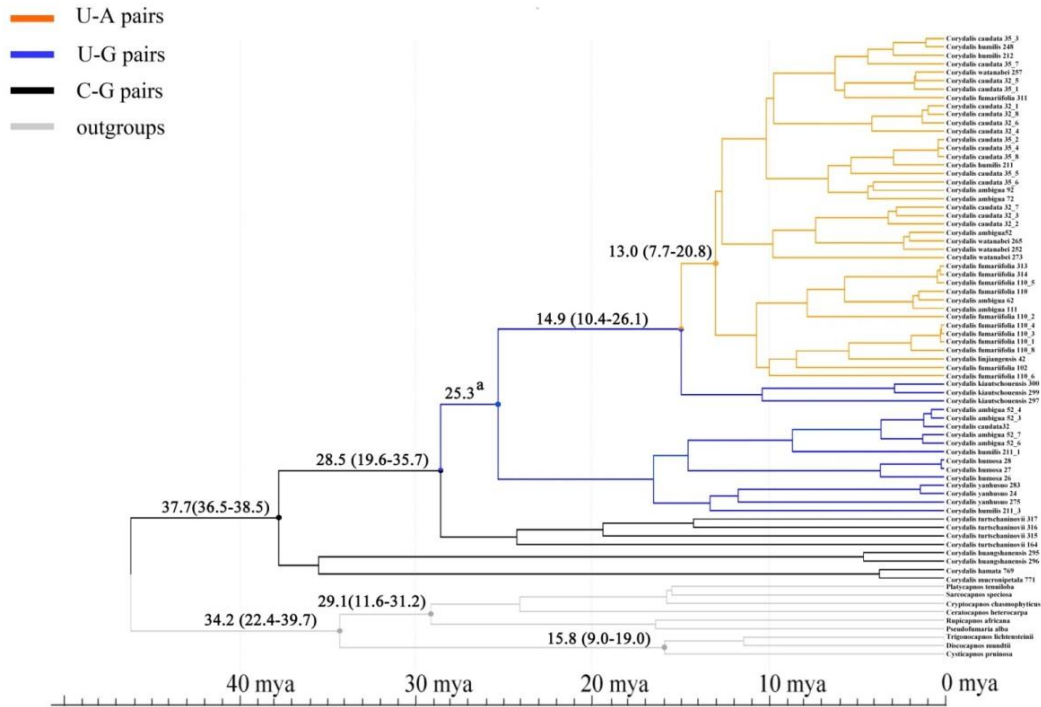

**Fig. S2.** A Molecular chronogram showing the divergence times of each substitution in the CBC process. Numbers in brackets are 95% highest posterior density (HPD) of this node age. <sup>a</sup> the 95% HPD in this node age was unavailable from BEAST.

**Table S1.** List of sample information used in this study

| Taxa                                   | Provenance                   | Voucher     | GenBank<br>Accession |
|----------------------------------------|------------------------------|-------------|----------------------|
| <i>Corydalis ambigua</i> 52            | Ji'an City, China            | JA140421017 | MH730587             |
| <i>Corydalis ambigua</i> 52_3          | Ji'an City, China            | JA140421017 | MH730612             |
| <i>Corydalis ambigua</i> 52_4          | Ji'an City, China            | JA140421017 | MH730613             |
| <i>Corydalis ambigua</i> 52_6          | Ji'an City, China            | JA140421017 | MH730611             |
| <i>Corydalis ambigua</i> 52_7          | Ji'an City, China            | JA140421017 | MH730610             |
| <i>Corydalis ambigua</i> 62            | Benxi City,China             | BX140428001 | MH730565             |
| <i>Corydalis ambigua</i> 72            | TonghuaCity,China            | TH140422001 | MH730596             |
| <i>Corydalis ambigua</i> 92            | Linjiang City,China          | LJ140430016 | MH730597             |
| <i>Corydalis caudata</i> 32_1          | Luoyang City, China          | LY140415001 | MH730576             |
| <i>Corydalis caudata</i> 32_2          | Luoyang City, China          | LY140415001 | MH730584             |
| <i>Corydalis caudata</i> 32_3          | Luoyang City, China          | LY140415001 | MH730585             |
| <i>Corydalis caudata</i> 32_4          | Luoyang City, China          | LY140415001 | MH730579             |
| <i>Corydalis caudata</i> 32_5          | Luoyang City, China          | LY140415001 | MH730580             |
| <i>Corydalis caudata</i> 32_6          | Luoyang City, China          | LY140415001 | MH730577             |
| <i>Corydalis caudata</i> 32_7          | Luoyang City, China          | LY140415001 | MH730586             |
| <i>Corydalis caudata</i> 32_8          | Luoyang City, China          | LY140415001 | MH730578             |
| <i>Corydalis caudata</i> 32            | Luoyang City, China          | LY140415001 | MH730609             |
| <i>Corydalis caudata</i> 35_1          | Luoyang City, China          | LY140415017 | MH730601             |
| <i>Corydalis caudata</i> 35_2          | Luoyang City, China          | LY140415017 | MH730592             |
| <i>Corydalis caudata</i> 35_3          | Luoyang City, China          | LY140415017 | MH730599             |
| <i>Corydalis caudata</i> 35_4          | Luoyang City, China          | LY140415017 | MH730593             |
| <i>Corydalis caudata</i> 35_5          | Luoyang City, China          | LY140415017 | MH730594             |
| <i>Corydalis caudata</i> 35_6          | Luoyang City, China          | LY140415017 | MH730598             |
| <i>Corydalis caudata</i> 35_7          | Luoyang City, China          | LY140415017 | MH730581             |
| <i>Corydalis caudata</i> 35_8          | Luoyang City, China          | LY140415017 | MH730595             |
| <i>Corydalis fumariifolia</i> 102      | Jilin City, China            | JL140419001 | MH730568             |
| <i>Corydalis fumariifolia</i> 110      | Shangzhi City, China         | SZ140428002 | MH730567             |
| <i>Corydalis fumariifolia</i> 110_1    | Shangzhi City, China         | SZ140428002 | MH730569             |
| <i>Corydalis fumariifolia</i> 110_2    | Shangzhi City, China         | SZ140428002 | MH730574             |
| <i>Corydalis fumariifolia</i> 110_3    | Shangzhi City, China         | SZ140428002 | MH730571             |
| <i>Corydalis fumariifolia</i> 110_4    | Shangzhi City, China         | SZ140428002 | MH730572             |
| <i>Corydalis fumariifolia</i> 110_5    | Shangzhi City, China         | SZ140428002 | MH730563             |
| <i>Corydalis fumariifolia</i> 110_6    | Shangzhi City, China         | SZ140428002 | MH730573             |
| <i>Corydalis fumariifolia</i> 110_8    | Shangzhi City, China         | SZ140428002 | MH730570             |
| <i>Corydalis fumariifolia</i> 111      | Mudanjiang City,<br>China    | MD140429001 | MH730566             |
| <i>Corydalis fumariifolia</i> 311      | Huinan County, China         | HN140419001 | MH730575             |
| <i>Corydalis fumariifolia</i> 313      | Huinan County, China         | HN140423001 | MH730564             |
| <i>Corydalis fumariifolia</i> 314      | Tonghua City, China          | TH140502001 | MH730562             |
| <i>Corydalis huangshanensis</i><br>295 | Huangshan District,<br>China | HS160323001 | MH730623             |
| <i>Corydalis huangshanensis</i><br>296 | Huangshan District,<br>China | HS160323007 | MH730624             |
| <i>Corydalis humilis</i> 211           | Dongchang District,<br>China | DC140420005 | MH730591             |
| <i>Corydalis humilis</i> 211_1         | Dongchang District,<br>China | DC140420005 | MH730614             |
| <i>Corydalis humilis</i> 211_3         | Dongchang District,<br>China | DC140420005 | MH730615             |
| <i>Corydalis humilis</i> 212           | Ji'an City, China            | JA140421001 | MH730582             |
| <i>Corydalis humilis</i> 248           | Liuhe County, China          | LH140423005 | MH730583             |
| <i>Corydalis humosa</i> 26             | Song County, China           | S140415001  | MH730606             |

|                                      |                              |              |          |
|--------------------------------------|------------------------------|--------------|----------|
| <i>Corydalis humosa</i> 27           | Song County, China           | S140415010   | MH730607 |
| <i>Corydalis humosa</i> 28           | Song County, China           | S140415012   | MH730608 |
| <i>Corydalis kiautschouensis</i> 297 | Weihai City, China           | WH170409001  | MH730602 |
| <i>Corydalis kiautschouensis</i> 299 | Muping district, China       | MP140407001  | MH730603 |
| <i>Corydalis kiautschouensis</i> 300 | Yantai City, China           | YT170407013  | MH730604 |
| <i>Corydalis linjiangensis</i> 42    | Linjiang City, China         | LJ170430001  | MH730605 |
| <i>Corydalis turtschaninovii</i> 164 | Dongchang District,<br>China | DC140420007  | MH730619 |
| <i>Corydalis turtschaninovii</i> 315 | Huinan County, China         | HN170422012  | MH730620 |
| <i>Corydalis turtschaninovii</i> 316 | Baishan City, China          | BS140424001  | MH730621 |
| <i>Corydalis turtschaninovii</i> 317 | Liaoyuan City, China         | LY140427001  | MH730622 |
| <i>Corydalis watanabei</i> 252       | Tonghua City, China          | TH140422021  | MH730588 |
| <i>Corydalis watanabei</i> 257       | Benxi City, China            | BX140429001  | MH730600 |
| <i>Corydalis watanabei</i> 265       | Linjiang City, China         | LJ140430023  | MH730589 |
| <i>Corydalis watanabei</i> 273       | Harbin City, China           | HRB140418001 | MH730590 |
| <i>Corydalis yanhusuo</i> 24         | Hefei City, China            | HF140309001  | MH730616 |
| <i>Corydalis yanhusuo</i> 275        | Chuzhou City, China          | CZ170315001  | MH730618 |
| <i>Corydalis yanhusuo</i> 283        | Jinhua City, China           | JH170316001  | MH730617 |
| <i>Corydalis hamata</i>              | GenBank                      | --           | LN610769 |
| <i>Corydalis mucronipetala</i>       | GenBank                      | --           | LN610771 |
| <i>Cryptocapnos chasmophyticus</i>   | GenBank                      | --           | HE603303 |
| <i>Cysticapnos pruinosa</i>          | GenBank                      | --           | HE603318 |
| <i>Discocapnos mundtii</i>           | GenBank                      | --           | HE603316 |
| <i>Ceratocapnos heterocarpa</i>      | GenBank                      | --           | HE603310 |
| <i>Platycapnos tenuiloba</i>         | GenBank                      | --           | HE603312 |
| <i>Pseudofumaria alba</i>            | GenBank                      | --           | HE603315 |
| <i>Rupicapnos africana</i>           | GenBank                      | --           | HE603304 |
| <i>Sarcocapnos speciosa</i>          | GenBank                      | --           | AJ250626 |
| <i>Trigonocapnos lichtensteinii</i>  | GenBank                      | --           | HE603317 |

---

**Table S2.** Substitution saturation test for different ITS2 partitions

| Partition        | Substitution saturation test <sup>a</sup> |             |       |              |       |
|------------------|-------------------------------------------|-------------|-------|--------------|-------|
|                  | Iss                                       | Iss.c (Sym) | P     | Iss.c (Asym) | P     |
| Paired regions   | 0.060                                     | 0.761       | 0.000 | 0.509        | 0.000 |
| Unpaired regions | 0.149                                     | 0.897       | 0.000 | 0.748        | 0.000 |
| All regions      | 0.096                                     | 0.691       | 0.000 | 0.376        | 0.000 |

<sup>a</sup> Iss: estimated index of substitution saturation; Iss.c (Sym): critical values for the index of substitution saturation, if the true tree is symmetrical; Iss.c (Asym): critical values for the index of substitution saturation, if the true tree is asymmetrical. Iss < Iss.c significantly indicates no saturation.

**Table S3.** Comparison of likelihood scores between DNA- and RNA-specific models applied to the ITS2 alignments

| Rank | DNA model  |           |           | Mixed model (DNA model_ RNA model) |           |                             |           |
|------|------------|-----------|-----------|------------------------------------|-----------|-----------------------------|-----------|
|      | Model Name | -lnL      | AIC       | Model Name                         | -lnL      | lnL Adjustment <sup>a</sup> | AIC       |
| 1    | GTR+G      | 1462.9765 | 3199.953  | REV+G_RNA16D+G                     | 1370.3015 |                             | 3020.603  |
| 2    | GTR+I+G    | 1462.9833 | 3201.9666 | REV+G_RNA16E+G                     | 1372.6267 |                             | 3023.2534 |
| 3    | TIM3+G     | 1467.3607 | 3204.7213 | REV+G_RNA16A+G                     | 1359.8264 |                             | 3025.6528 |
| 4    | TIM3+I+G   | 1467.3834 | 3206.7669 | REV+G_RNA16A                       | 1361.3247 |                             | 3026.6494 |
| 5    | TVM+G      | 1467.5081 | 3207.0163 | REV+G_RNA16J+G                     | 1364.4634 |                             | 3030.9268 |
| 6    | TIM1+G     | 1469.4458 | 3208.8916 | REV+G_RNA16D                       | 1377.9739 |                             | 3033.9478 |
| 7    | TVM+I+G    | 1467.5125 | 3209.025  | REV+G_RNA16F+G                     | 1378.8042 |                             | 3035.6084 |
| 8    | TIM1+I+G   | 1469.45   | 3210.8999 | REV+G_RNA16C+G                     | 1374.2618 |                             | 3036.5236 |
| 9    | TPM3uf+G   | 1472.023  | 3212.0459 | REV+G_RNA16I+G                     | 1364.2858 |                             | 3036.5716 |
| 10   | TPM1uf+G   | 1472.6944 | 3213.3888 | REV+G_RNA16C                       | 1375.6239 |                             | 3037.2478 |
| 11   | TPM3uf+I+G | 1472.0272 | 3214.0544 | REV+G_RNA16K+G                     | 1369.9687 |                             | 3039.9374 |
| 12   | TPM1uf+I+G | 1472.6989 | 3215.3978 | REV+G_RNA16J                       | 1370.2972 |                             | 3040.5944 |
| 13   | TIM2+G     | 1474.9474 | 3219.8948 | REV+G_RNA16B+G                     | 1371.921  |                             | 3041.842  |
| 14   | TrN+G      | 1475.9901 | 3219.9802 | REV+G_RNA16F                       | 1383.6011 |                             | 3043.2022 |
| 15   | TIM2+I+G   | 1474.9514 | 3221.9028 | HKY85+G_RNA16D+G                   | 1386.4661 |                             | 3044.9322 |
| 16   | TrN+I+G    | 1475.9949 | 3221.9898 | REV+G_RNA16I                       | 1370.2123 |                             | 3046.4246 |
| 17   | TPM2uf+G   | 1478.151  | 3224.302  | HKY85+G_RNA16E+G                   | 1388.8091 |                             | 3047.6182 |
| 18   | HKY+G      | 1479.3695 | 3224.739  | REV+G_RNA16E                       | 1385.9934 |                             | 3047.9868 |
| 19   | TPM2uf+I+G | 1478.1562 | 3226.3123 | HKY85+G_RNA16A+G                   | 1375.9903 |                             | 3049.9806 |
| 20   | HKY+I+G    | 1479.377  | 3226.754  | HKY85+G_RNA16A                     | 1377.5322 |                             | 3051.0644 |
| 21   | GTR+I      | 1490.6966 | 3255.3931 | HKY85+G_RNA16J+G                   | 1380.6521 |                             | 3055.3042 |
| 22   | TPM1+G     | 1497.1791 | 3256.3582 | REV+G_RNA16K                       | 1379.0422 |                             | 3056.0844 |
| 23   | TIM1ef+G   | 1496.3689 | 3256.7377 | HKY85+G_RNA16D                     | 1394.1016 |                             | 3058.2032 |
| 24   | TPM1+I+G   | 1497.1838 | 3258.3677 | HKY85+G_RNA16F+G                   | 1394.918  |                             | 3059.836  |
| 25   | TIM1ef+I+G | 1496.3736 | 3258.7472 | HKY85+G_RNA16C+G                   | 1390.4142 |                             | 3060.8284 |

|    |            |           |           |                           |           |          |           |
|----|------------|-----------|-----------|---------------------------|-----------|----------|-----------|
| 26 | K80+G      | 1499.5283 | 3259.0566 | HKY85+G_RNA16I+G          | 1380.4762 |          | 3060.9524 |
| 27 | TVMef+G    | 1496.5959 | 3259.1918 | HKY85+G_RNA16C            | 1391.8151 |          | 3061.6302 |
| 28 | TrNef+G    | 1498.7125 | 3259.425  | HKY85+G_RNA16K+G          | 1386.2277 |          | 3064.4554 |
| 29 | TPM3+G     | 1498.7133 | 3259.4266 | HKY85+G_RNA16J            | 1386.4711 |          | 3064.9422 |
| 30 | TIM3+I     | 1494.8468 | 3259.6935 | HKY85+G_RNA16B+G          | 1388.1894 |          | 3066.3788 |
| 31 | TIM1+I     | 1494.9052 | 3259.8103 | HKY85+G_RNA16F            | 1399.7225 |          | 3067.445  |
| 32 | SYM+G      | 1495.9445 | 3259.8891 | REV+G_RNA16B              | 1385.6902 |          | 3067.3804 |
| 33 | TIM3ef+G   | 1498.0523 | 3260.1046 | HKY85+G_RNA16I            | 1386.3946 |          | 3070.7892 |
| 34 | TPM2+G     | 1499.5185 | 3261.0371 | HKY85+G_RNA16E            | 1402.1011 |          | 3072.2022 |
| 35 | K80+I+G    | 1499.5331 | 3261.0663 | HKY85+G_RNA16K            | 1396.0562 |          | 3082.1124 |
| 36 | TVMef+I+G  | 1496.6006 | 3261.2011 | HKY85+G_RNA16B            | 1401.9035 |          | 3091.807  |
| 37 | TIM2ef+G   | 1498.6893 | 3261.3786 | REV+G_RNA7C+G.empirical   | 1433.4843 | 154.7539 | 3182.9686 |
| 38 | TrNef+I+G  | 1498.7168 | 3261.4336 | REV+G_RNA7C.empirical     | 1436.9497 | 154.7539 | 3187.8994 |
| 39 | TPM3+I+G   | 1498.7181 | 3261.4362 | REV+G_RNA7F+G.empirical   | 1446.9    | 154.7539 | 3191.8    |
| 40 | SYM+I+G    | 1495.9488 | 3261.8976 | REV+G_RNA7G+G.empirical   | 1449.5637 | 154.7539 | 3193.1274 |
| 41 | TIM3ef+I+G | 1498.0567 | 3262.1134 | REV+G_RNA7F.empirical     | 1449.5859 | 154.7539 | 3195.1718 |
| 42 | TPM2+I+G   | 1499.5229 | 3263.0458 | REV+G_RNA7A+G.empirical   | 1430.4465 | 154.7539 | 3198.893  |
| 43 | TIM2ef+I+G | 1498.6937 | 3263.3873 | REV+G_RNA7G.empirical     | 1454.4753 | 154.7539 | 3200.9506 |
| 44 | GTR        | 1495.6954 | 3263.3908 | REV+G_RNA7A.empirical     | 1432.1082 | 154.7539 | 3200.2164 |
| 45 | TVM+I      | 1496.8109 | 3265.6217 | REV+G_RNA7E+G.empirical   | 1452.7082 | 154.7539 | 3205.4164 |
| 46 | TIM1       | 1499.1185 | 3266.237  | REV+G_RNA7D+G.empirical   | 1450.8772 | 154.7539 | 3205.7544 |
| 47 | TPM3uf+I   | 1499.2883 | 3266.5766 | HKY85+G_RNA7C+G.empirical | 1449.7442 | 154.7539 | 3207.4884 |
| 48 | TrN+I      | 1499.3564 | 3266.7128 | REV+G_RNA7B+G.empirical   | 1437.8138 | 154.7539 | 3207.6276 |
| 49 | TIM3       | 1499.8525 | 3267.7049 | REV+G_RNA7D.empirical     | 1453.596  | 154.7539 | 3209.192  |
| 50 | TPM1uf+I   | 1499.9509 | 3267.9019 | REV+G_RNA7B.empirical     | 1439.5691 | 154.7539 | 3209.1382 |
| 51 | TIM2+I     | 1500.3099 | 3270.6198 | REV+G_RNA7E.empirical     | 1457.6013 | 154.7539 | 3213.2026 |
| 52 | HKY+I      | 1504.2704 | 3274.5408 | HKY85+G_RNA7C.empirical   | 1453.8049 | 154.7539 | 3213.6098 |
| 53 | TrN        | 1504.7091 | 3275.4182 | HKY85+G_RNA7F+G.empirical | 1463.1517 | 154.7539 | 3216.3034 |
| 54 | TIM2       | 1504.1002 | 3276.2004 | HKY85+G_RNA7G+G.empirical | 1465.8433 | 154.7539 | 3217.6866 |
| 55 | TPM2uf+I   | 1504.9887 | 3277.9773 | HKY85+G_RNA7F.empirical   | 1465.8306 | 154.7539 | 3219.6612 |



|    |          |           |           |                           |           |          |           |
|----|----------|-----------|-----------|---------------------------|-----------|----------|-----------|
| 56 | TVM      | 1504.3027 | 3278.6055 | HKY85+G_RNA7A+G.empirical | 1446.1848 | 154.7539 | 3222.3696 |
| 57 | TPM1uf   | 1506.6756 | 3279.3512 | HKY85+G_RNA7G.empirical   | 1470.6894 | 154.7539 | 3225.3788 |
| 58 | TPM3uf   | 1508.5862 | 3283.1724 | HKY85+G_RNA7A.empirical   | 1448.3157 | 154.7539 | 3224.6314 |
| 59 | HKY      | 1509.779  | 3283.558  | HKY85+G_RNA7E+G.empirical | 1468.9788 | 154.7539 | 3229.9576 |
| 60 | TPM2uf   | 1511.3191 | 3288.6381 | HKY85+G_RNA7D+G.empirical | 1467.1223 | 154.7539 | 3230.2446 |
| 61 | F81+G    | 1514.8886 | 3293.7772 | HKY85+G_RNA7B+G.empirical | 1454.0143 | 154.7539 | 3232.0286 |
| 62 | F81+I+G  | 1515.1861 | 3296.3722 | HKY85+G_RNA7D.empirical   | 1469.8283 | 154.7539 | 3233.6566 |
| 63 | TIM1ef+I | 1518.5697 | 3301.1395 | HKY85+G_RNA7B.empirical   | 1455.7662 | 154.7539 | 3233.5324 |
| 64 | TPM1+I   | 1520.2679 | 3302.5357 | HKY85+G_RNA7E.empirical   | 1473.7931 | 154.7539 | 3237.5862 |
| 65 | TrNef+I  | 1520.6333 | 3303.2666 | REV+G_RNA7C+G.equal       | 1472.1475 | 193.4171 | 3242.295  |
| 66 | TIM1ef   | 1521.2244 | 3304.4489 | REV+G_RNA7C.equal         | 1475.6129 | 193.4171 | 3247.2258 |
| 67 | TIM3ef+I | 1520.2462 | 3304.4924 | REV+G_RNA7F+G.equal       | 1485.5632 | 193.4171 | 3251.1264 |
| 68 | K80+I    | 1522.3233 | 3304.6467 | REV+G_RNA7G+G.equal       | 1488.2269 | 193.4171 | 3252.4538 |
| 69 | SYM+I    | 1518.3805 | 3304.7611 | REV+G_RNA7F.equal         | 1488.2491 | 193.4171 | 3254.4982 |
| 70 | TIM2ef+I | 1520.5744 | 3305.1487 | REV+G_RNA7A+G.equal       | 1469.1097 | 193.4171 | 3258.2194 |
| 71 | TPM3+I   | 1521.8728 | 3305.7456 | REV+G_RNA7G.equal         | 1493.1385 | 193.4171 | 3260.277  |
| 72 | TVMef+I  | 1520.0417 | 3306.0834 | REV+G_RNA7A.equal         | 1470.7714 | 193.4171 | 3259.5428 |
| 73 | TrNef    | 1523.2345 | 3306.4691 | REV+G_RNA7E+G.equal       | 1491.3714 | 193.4171 | 3264.7428 |
| 74 | TPM2+I   | 1522.2613 | 3306.5226 | REV+G_RNA7D+G.equal       | 1489.5404 | 193.4171 | 3265.0808 |
| 75 | TPM1     | 1523.7237 | 3307.4474 | HKY85+G_RNA7C+G.equal     | 1488.4074 | 193.4171 | 3266.8148 |
| 76 | TIM3ef   | 1522.87   | 3307.7401 | REV+G_RNA7B+G.equal       | 1476.477  | 193.4171 | 3266.954  |
| 77 | SYM      | 1521.0103 | 3308.0206 | REV+G_RNA7D.equal         | 1492.2592 | 193.4171 | 3268.5184 |
| 78 | TIM2ef   | 1523.2106 | 3308.4213 | REV+G_RNA7B.equal         | 1478.2323 | 193.4171 | 3268.4646 |
| 79 | K80      | 1525.7239 | 3309.4478 | REV+G_RNA7E.equal         | 1496.2645 | 193.4171 | 3272.529  |
| 80 | TPM3     | 1525.3741 | 3310.7482 | HKY85+G_RNA7C.equal       | 1492.4681 | 193.4171 | 3272.9362 |
| 81 | TVMef    | 1523.5213 | 3311.0426 | HKY85+G_RNA7F+G.equal     | 1501.8149 | 193.4171 | 3275.6298 |
| 82 | TPM2     | 1525.6989 | 3311.3978 | HKY85+G_RNA7G+G.equal     | 1504.5065 | 193.4171 | 3277.013  |
| 83 | JC+G     | 1527.2976 | 3312.5952 | HKY85+G_RNA7F.equal       | 1504.4938 | 193.4171 | 3278.9876 |
| 84 | JC+I+G   | 1527.3051 | 3314.6102 | HKY85+G_RNA7A+G.equal     | 1484.848  | 193.4171 | 3281.696  |
| 85 | F81+I    | 1539.8552 | 3343.7103 | HKY85+G_RNA7G.equal       | 1509.3526 | 193.4171 | 3284.7052 |

|    |      |           |           |                       |           |          |           |
|----|------|-----------|-----------|-----------------------|-----------|----------|-----------|
| 86 | F81  | 1543.7009 | 3349.4019 | HKY85+G_RNA7A.equal   | 1486.9789 | 193.4171 | 3283.9578 |
| 87 | JC+I | 1549.0168 | 3356.0336 | HKY85+G_RNA7E+G.equal | 1507.642  | 193.4171 | 3289.284  |
| 88 | JC   | 1552.2796 | 3360.5592 | HKY85+G_RNA7D+G.equal | 1505.7855 | 193.4171 | 3289.571  |
| 89 |      |           |           | HKY85+G_RNA7B+G.equal | 1492.6775 | 193.4171 | 3291.355  |
| 90 |      |           |           | HKY85+G_RNA7D.equal   | 1508.4915 | 193.4171 | 3292.983  |
| 91 |      |           |           | HKY85+G_RNA7B.equal   | 1494.4294 | 193.4171 | 3292.8588 |
| 92 |      |           |           | HKY85+G_RNA7E.equal   | 1512.4563 | 193.4171 | 3296.9126 |

---

<sup>a</sup> In order to comparable with other models, the 7-state models require a likelihood-adjustment value to account for the mapping from 1 mismatch state to 10, and each of the frequencies needs to be defined. This problem can be addressed by using empirical frequencies or by assuming that all non-canonical di-nucleotides are equally likely (Allen & Whelan, 2014). The corresponding results are marked as “empirical” and “equal,” respectively, after their model names.

**Table S4.** The best-fit substitution rate matrix, mutabilities, base-pair frequencies and substitution rate parameters for the ITS2 paired region in *Corydalis*, inferred using the RNA16D+G model

| Base pair <sup>a</sup>    | Elements of the rate matrix |      |      |      |                   |      |      |      |                      |      |      |      |                      |      |      |      | Mutability | Frequency |
|---------------------------|-----------------------------|------|------|------|-------------------|------|------|------|----------------------|------|------|------|----------------------|------|------|------|------------|-----------|
|                           | GC                          | CG   | AU   | UA   | GU                | UG   | AA   | AG   | GA                   | CC   | CU   | UC   | GG                   | UU   | AC   | CA   |            |           |
| <b>GC</b>                 | ----                        | 0    | 0    | 0    | 0.14              | 0    | 0    | 0    | 0.05                 | 0.06 | 0    | 0.03 | 0.07                 | 0    | 0.10 | 0    | 0.45       | 31.69%    |
| <b>CG</b>                 | 0                           | ---- | 0    | 0    |                   | 0.14 | 0    | 0.05 | 0                    | 0.06 | 0.03 | 0    | 0.07                 | 0    | 0    | 0.10 | 0.45       | 31.69%    |
| <b>AU</b>                 | 0                           | 0    | ---- | 0    | 0.37              | 0    | 0.05 | 0.07 | 0                    | 0    | 0.06 | 0    | 0                    | 0.03 | 0.13 | 0    | 0.71       | 9.62%     |
| <b>UA</b>                 | 0                           | 0    | 0    | ---- | 0                 | 0.37 | 0.05 | 0    | 0.07                 | 0    | 0    | 0.06 | 0                    | 0.03 | 0    | 0.13 | 0.71       | 9.62%     |
| <b>GU</b>                 | 1.11                        | 0    | 0.89 | 0    | ----              | 0    | 0    | 0    | 0.09                 | 0    | 0.11 | 0    | 0.12                 | 0.05 | 0    | 0    | 2.37       | 4.03%     |
| <b>UG</b>                 | 0                           | 1.11 | 0    | 0.89 | 0                 | ---- | 0    | 0.09 | 0                    | 0    | 0    | 0.11 | 0.12                 | 0.05 | 0    | 0    | 2.37       | 4.03%     |
| <b>AA</b>                 | 0                           | 0    | 0.56 | 0.56 | 0                 | 0    | ---- | 0.68 | 0.68                 | 0    | 0    | 0    | 0                    | 0    | 0.28 | 0.28 | 3.04       | 0.81%     |
| <b>AG</b>                 | 0                           | 1.32 | 0.56 | 0    | 0                 | 0.31 | 0.49 | ---- | 0                    | 0    | 0    | 0    | 0.68                 | 0    | 0.28 | 0    | 3.64       | 1.14%     |
| <b>GA</b>                 | 1.32                        | 0    | 0    | 0.56 | 0.31              | 0    | 0.49 | 0    | ----                 | 0    | 0    | 0    | 0.68                 | 0    | 0    | 0.28 | 3.64       | 1.14%     |
| <b>CC</b>                 | 1.48                        | 1.48 | 0    | 0    | 0                 | 0    | 0    | 0    | 0                    | ---- | 0.26 | 0.26 | 0                    | 0    | 0.22 | 0.22 | 3.92       | 1.27%     |
| <b>CU</b>                 | 0                           | 1.48 | 1.05 | 0    | 0.81              | 0    | 0    | 0    | 0                    | 0.61 | ---- | 0    | 0                    | 0.26 | 0    | 0.22 | 4.43       | 0.54%     |
| <b>UC</b>                 | 1.48                        | 0    | 0    | 1.05 | 0                 | 0.81 | 0    | 0    | 0                    | 0.61 | 0    | ---- | 0                    | 0.26 | 0.22 | 0    | 4.43       | 0.54%     |
| <b>GG</b>                 | 1.32                        | 1.32 | 0    | 0    | 0.31              | 0.31 | 0    | 0.49 | 0.49                 | 0    | 0    | 0    | ----                 | 0    | 0    | 0    | 4.24       | 1.60%     |
| <b>UU</b>                 | 0                           | 0    | 1.05 | 1.05 | 0.81              | 0.81 | 0    | 0    | 0                    | 0    | 0.61 | 0.61 | 0                    | ---- | 0    | 0    | 4.94       | 0.23%     |
| <b>AC</b>                 | 3.22                        | 0    | 1.22 | 0    | 0                 | 0    | 0.22 | 0.31 | 0                    | 0.28 | 0    | 0.12 | 0                    | 0    | ---- | 0.0  | 5.37       | 1.02%     |
| <b>CA</b>                 | 0                           | 3.22 | 0    | 1.22 | 0                 | 0    | 0.22 | 0    | 0.31                 | 0.28 | 0.12 | 0    | 0                    | 0    | 0    | ---- | 5.37       | 1.02%     |
| <b>Substitution rates</b> | r <sub>d</sub> =0           |      |      |      | r <sub>v</sub> =0 |      |      |      | r <sub>f</sub> =1.03 |      |      |      | r <sub>b</sub> =4.01 |      |      |      |            |           |

<sup>a</sup> The last ten base-pairs (from AA to CA) are collectively called mismatch (MM) pairs in this study.
